# Supplementary material for: SARS-CoV-2 Viral Clearance and Evolution Varies by Extent of Immunodeficiency
Source: PubMed Central journal article supplement — medRxiv. 2023 Aug 7:2023.07.31.23293441. Preprint. [Version 2] doi: 10.1101/2023.07.31.23293441 (PMC10418302; doi:10.1101/2023.07.31.23293441), 2023-08-07
Supplement: NIHPP2023.07.31.23293441v2-supplement-1.pdf [file NIHPP2023.07.31.23293441v2-supplement-1.pdf]

## Supplementary Materials

|                                                                                                                                                                                                            |    |
|------------------------------------------------------------------------------------------------------------------------------------------------------------------------------------------------------------|----|
| Supplementary Methods .....                                                                                                                                                                                | 2  |
| T cell proliferation staining panels .....                                                                                                                                                                 | 2  |
| Generalized estimating equation (GEE) .....                                                                                                                                                                | 2  |
| Supplementary Tables .....                                                                                                                                                                                 | 3  |
| Supplementary Table 1. Categorization for immunocompromising conditions.....                                                                                                                               | 3  |
| Supplementary Table 2. Diagnoses for immunocompromised participants and categorization.<br>.....                                                                                                           | 4  |
| Supplementary Table 3. Monoclonal antibody use. ....                                                                                                                                                       | 6  |
| Supplementary Figures .....                                                                                                                                                                                | 7  |
| Supplementary Figure 1. Detectable SARS-CoV-2 viral RNA (a) and culturable SARS-CoV-2<br>virus (b) beyond 30 days after symptom onset or first positive PCR/antigen tests,<br>supplemental to Fig. 1. .... | 7  |
| Supplementary Figure 2. SARS-CoV-2 mutations among different immunocompromised<br>groups, supplementary to Fig. 2.....                                                                                     | 8  |
| Supplementary Figure 3. Severe immunocompromise is associated with lower neutralizing<br>antibody levels, supplemental to Fig. 3. ....                                                                     | 9  |
| Supplementary Figure 4. Representative T cell proliferation assay gating scheme,<br>supplemental to Fig. 4.....                                                                                            | 10 |
| Supplementary Figure 5. Distribution of duration between symptom onset or first positive PCR<br>and blood draws. ....                                                                                      | 11 |
| References.....                                                                                                                                                                                            | 12 |

## Supplementary Methods

### T cell proliferation staining panels

For PBMCs stained with carboxyfluorescein succinimidyl ester (CFSE; Life Technologies), cells were then washed and stained with anti-CD3 PE-Cy7 (clone SK7; BioLegend), anti-CD8 APC (clone SK1; BioLegend), anti-CD4 BV711 (clone RPA-T4; BioLegend), and LIVE/DEAD violet viability dye (Life Technologies).

For PBMCs stained with Cell Trace Far Red Proliferation Dye (CTFR, Invitrogen), cells were then washed and stained with anti-CD3 APC-Cy7 (clone UCHT1; BioLegend), anti-CD8 BV605 (clone SK1; BioLegend), anti-CD4 PE-Cy7 (clone OKT4; BioLegend), and LIVE/DEAD violet viability dye (Life Technologies).

### Generalized estimating equation (GEE)

GEE was performed using “geepack” package (version 1.3.9) in R<sup>1</sup>. In the GEE model, family was set as “gaussian”, and the correlation structure (“corstr”) was set as “independence”. Quasi Information Criterion (QIC) was used to compare models using “independence”, “exchangeable” and “ar1” and the one with “independence” had the lowest QIC. Monoclonal antibody (Mab) use, weeks since symptom onset or first positive PCR, numbers of vaccinations before enrollment, sex, and age were adjusted for in these models. Logarithm base 10 of the neutralizing antibody levels were treated as dependent variables and other variables as independent. Coefficients for all the independent variables were then transformed to the power of 10 and was shown in this figure as fold-change compared to reference group.

## Supplementary Tables

Supplementary Table 1. Categorization for immunocompromising conditions.

|                 |                                                      |                                                                                                                                                                                                                                                                                                                                                                                                                                                                                                                                                     |
|-----------------|------------------------------------------------------|-----------------------------------------------------------------------------------------------------------------------------------------------------------------------------------------------------------------------------------------------------------------------------------------------------------------------------------------------------------------------------------------------------------------------------------------------------------------------------------------------------------------------------------------------------|
| Non-Severe (NS) |                                                      | <ul style="list-style-type: none"> <li>• Autoimmune disease, receiving immunosuppressants that are not B cell/plasma cell targeted therapy within 12 months of study entry</li> <li>• Solid malignant tumor on treatment (excluding those who underwent resection and were considered in remission after resection)</li> <li>• Corticosteroid use equivalent to Prednisone &gt;20mg daily for at least 14 consecutive days within 30 days prior to study entry</li> <li>• HIV infection with CD4 cell count &gt;200 cells/mm<sup>3</sup></li> </ul> |
| Severe          | Severe- Hematological malignancy/Transplant (S-HT)   | <ul style="list-style-type: none"> <li>• Solid organ transplant (SOT)</li> <li>• Hematopoietic stem cell transplant (HSCT)</li> <li>• Lymphoma, leukemia</li> <li>• Immune-Related Adverse Event (irAE) on multiple immunosuppressants targeting different pathways</li> </ul>                                                                                                                                                                                                                                                                      |
|                 | Severe- Autoimmune and other B cell deficiency (S-A) | <ul style="list-style-type: none"> <li>• Autoimmune disease receiving B cell targeted therapy within 12 months of study entry</li> <li>• Congenital or late onset B cell deficiency (e.g. Common Variable Immunodeficiency)</li> </ul>                                                                                                                                                                                                                                                                                                              |

Supplementary Table 2. Diagnoses for immunocompromised participants and categorization.

| ID  | Diagnosis                                                        | Immunosuppressants/Treatment                                       | Group |
|-----|------------------------------------------------------------------|--------------------------------------------------------------------|-------|
| 100 | Antiphospholipid syndrome                                        | Prednisone, eculizumab, rituximab, cyclophosphamide                | S-A   |
| 101 | Heart and kidney transplant                                      | Everolimus, Prednisone 5mg daily, Tacrolimus                       | S-HT  |
| 107 | Rheumatoid arthritis                                             | Tocilizumab                                                        | NS    |
| 113 | Minimal change disease                                           | Rituximab within 12 months of COVID-19                             | S-A   |
| 126 | RA                                                               | Abatacept+ Prednisone 5mg daily                                    | NS    |
| 217 | RA                                                               | Methotrexate+ Prednisone 5mg daily                                 | NS    |
| 240 | Chronic myelogenous leukemia                                     | Dasatinib                                                          | S-HT  |
| 245 | Diffuse large B-cell lymphoma                                    | Rituximab+Polatuzumab+Prednisone, CAR-T, Chemotherapy, Tocilizumab | S-HT  |
| 388 | Adenocarcinoma of pancreas                                       | Chemotherapy and radiation                                         | NS    |
| 449 | Granulomatosis with polyangiitis                                 | Rituximab within 12 months of COVID-19                             | S-A   |
| 459 | Immune Related Adverse Events, Metastatic Merkel cell carcinoma  | Pembrolizumab, Tacrolimus, Prednisone, Mycophenolate               | S-HT  |
| 470 | Multiple sclerosis                                               | Ocrelizumab within 12 months of COVID-19                           | S-A   |
| 471 | Marginal zone lymphoma (CR)                                      | Obinutuzumab+CHOP                                                  | S-HT  |
| 475 | Multiple sclerosis                                               | Rituximab within 12 months of COVID-19                             | S-A   |
| 497 | Diffuse large B-cell lymphoma (CR), Hypogammaglobulinemia        | Rituximab-CHOP                                                     | S-HT  |
| 531 | Sarcoidosis                                                      | Infliximab                                                         | NS    |
| 532 | Granulomatosis with polyangiitis                                 | Mycophenolate                                                      | NS    |
| 533 | Diffuse large B cell lymphoma, Hypogammaglobulinemia after CAR-T | CAR-T, Tocilizumab, Pembrolizumab, Rituximab, Corticosteroid       | S-HT  |
| 534 | RA, Sjogren's syndrome, Hypogammaglobulinemia; cryoglobulinemia  | IVIG                                                               | S-A   |
| 547 | RA                                                               | Tocilizumab+Methotrexate                                           | NS    |
| 548 | RA                                                               | Rituximab within 12 months of COVID-19+ Leflunomide                | S-A   |
| 549 | Bechet's disease                                                 | Azathioprine                                                       | NS    |
| 550 | RA                                                               | Methotrexate+ Hydroxychloroquine                                   | NS    |
| 551 | Psoriatic arthritis                                              | Infliximab                                                         | NS    |
| 552 | Seronegative spondyloarthropathy                                 | Adalimumab+ Methotrexate                                           | NS    |
| 557 | RA, SLE                                                          | Methotrexate                                                       | NS    |
| 558 | SLE                                                              | Belimumab                                                          | S-A   |
| 563 | RA                                                               | Adalimumab                                                         | NS    |
| 564 | Multiple myeloma                                                 | Daratumumab+ Dexamethasone                                         | S-HT  |
| 569 | SLE                                                              | Hydroxychloroquine+ Methylprednisolone daily 6mg                   | NS    |
| 573 | Inflammatory arthritis                                           | Adalimumab+ Hydroxychloroquine                                     | NS    |

|     |                                                    |                                                                     |      |
|-----|----------------------------------------------------|---------------------------------------------------------------------|------|
| 597 | Giant cell arteritis, polymyalgia rheumatica       | Tocilizumab+ Prednisone orally 5mg daily                            | NS   |
| 604 | CVID                                               | IVIg every 4 weeks                                                  | S-A  |
| 610 | Ulcerative colitis                                 | Infliximab                                                          | NS   |
| 658 | RA                                                 | Tocilizumab                                                         | NS   |
| 678 | RA                                                 | Tofacitinib                                                         | NS   |
| 687 | SLE, RA                                            | Hydroxychloroquine, methotrexate                                    | NS   |
| 688 | Mantle cell lymphoma                               | Zanubrutinib+Venetoclax; Last dose of Obinutuzumab within 12 months | S-HT |
| 691 | RA                                                 | Rituximab                                                           | S-A  |
| 708 | Minimal change disease                             | Rituximab                                                           | S-A  |
| 716 | RA                                                 | Methotrexate                                                        | NS   |
| 723 | Multiple sclerosis, acquired hypogammaglobulinemia | IVIg every 4 weeks; Ocrelizumab within 12 months                    | S-A  |
| 725 | RA                                                 | Infliximab, methotrexate, hydroxychloroquine                        | NS   |
| 735 | Psoriatic arthritis                                | Adalimumab                                                          | NS   |
| 768 | Ankylosing spondylitis                             | Secukinumab                                                         | NS   |
| 793 | RA                                                 | Adalimumab, methotrexate                                            | NS   |
| 805 | Ulcerative colitis, inflammatory arthritis         | Golimumab, methotrexate                                             | NS   |
| 870 | Mantle cell lymphoma                               | Bendamustine and rituximab within 12 months                         | S-HT |
| 892 | HIV infection                                      | N/A, on antiretroviral therapy, CD4 cell count>200                  | NS   |
| 936 | RA                                                 | Etanercept, hydroxychloroquine                                      | NS   |
| 945 | IgG4 related disease                               | Rituximab                                                           | S-A  |
| 946 | Diffuse large B-cell lymphoma                      | R-CHOP                                                              | S-HT |
| 952 | Inflammatory arthritis                             | Adalimumab                                                          | NS   |
| 953 | RA                                                 | Infliximab, methotrexate, prednisone 3mg                            | NS   |
| 965 | Breast cancer                                      | Trastuzumab deruxtecan within 12 months, then Olaparib              | NS   |
| 982 | Follicular lymphoma                                | Bendamustine, Obinutuzumab within 12 months                         | S-HT |

S-HT, severe hematological oncology/Transplant; S-A, severe autoimmune disease/B-cell deficient; NS, non-severe immunocompromise; CAR-T, chimeric antigen receptor T-cell therapy; CR, complete remission; CHOP, cyclophosphamide, doxorubicin, vincristine, and prednisone; R-CHOP, Rituximab in combination with CHOP; RA, rheumatoid arthritis; SLE, systemic lupus erythematosus; CVID, common variable immunodeficiency

Supplementary Table 3. Monoclonal antibody use.

|                         | S-HT<br>(N=12) | S-A<br>(N=13)  | NS<br>(N=31) | None<br>(N=184) | Overall<br>(N=240) |
|-------------------------|----------------|----------------|--------------|-----------------|--------------------|
| Bamlanivimab-Etesevimab | 1              | 0              | 0            | 4               | 5                  |
| Casirivimab-Imdevimab   | 0              | 2 <sup>b</sup> | 2            | 5               | 9                  |
| Sotrovimab              | 4 <sup>a</sup> | 1              | 1            | 0               | 6                  |
| Bebtelovimab            | 3              | 2              | 2            | 1               | 8                  |
| Tixagevimab-Cilgavimab  | 5 <sup>c</sup> | 4              | 0            | 0               | 9                  |

a, three participants received Sotrovimab after blood draws.

b, one participant received Casirivimab-Imdevimab after blood draws.

c, two participants received both Tixagevimab-Cilgavimab and Sotrovimab and one participant received both Tixagevimab-Cilgavimab and Bebtelovimab

## Supplementary Figures

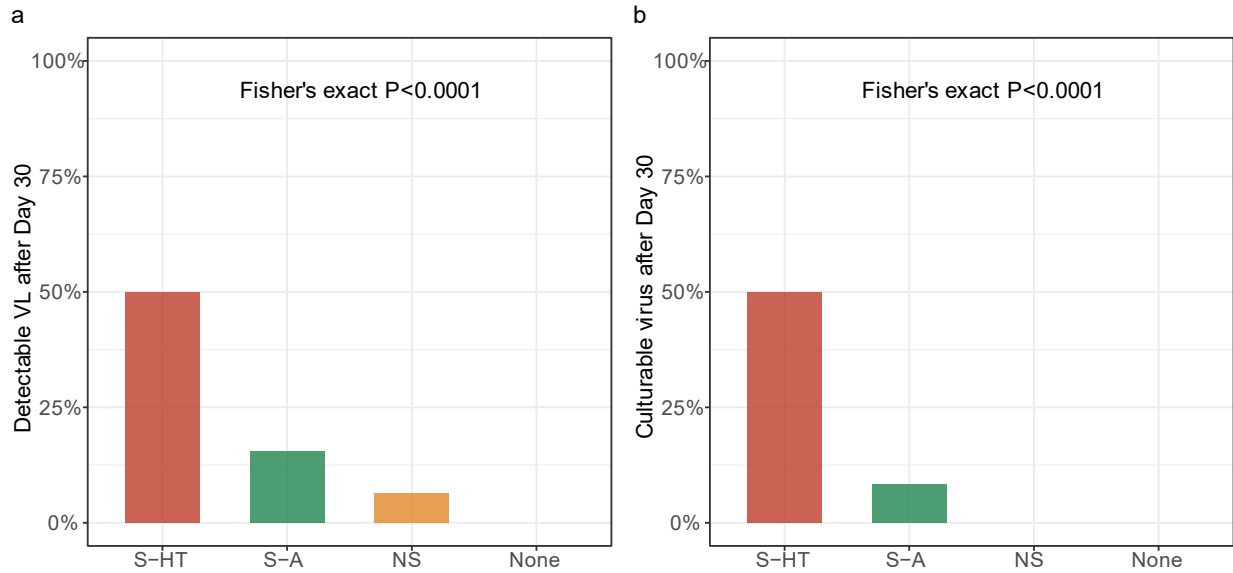

Supplementary Figure 1. Detectable SARS-CoV-2 viral RNA (a) and culturable SARS-CoV-2 virus (b) beyond 30 days after symptom onset or first positive PCR/antigen tests, supplemental to Fig. 1.

Fisher's exact test was used to calculate the P values.

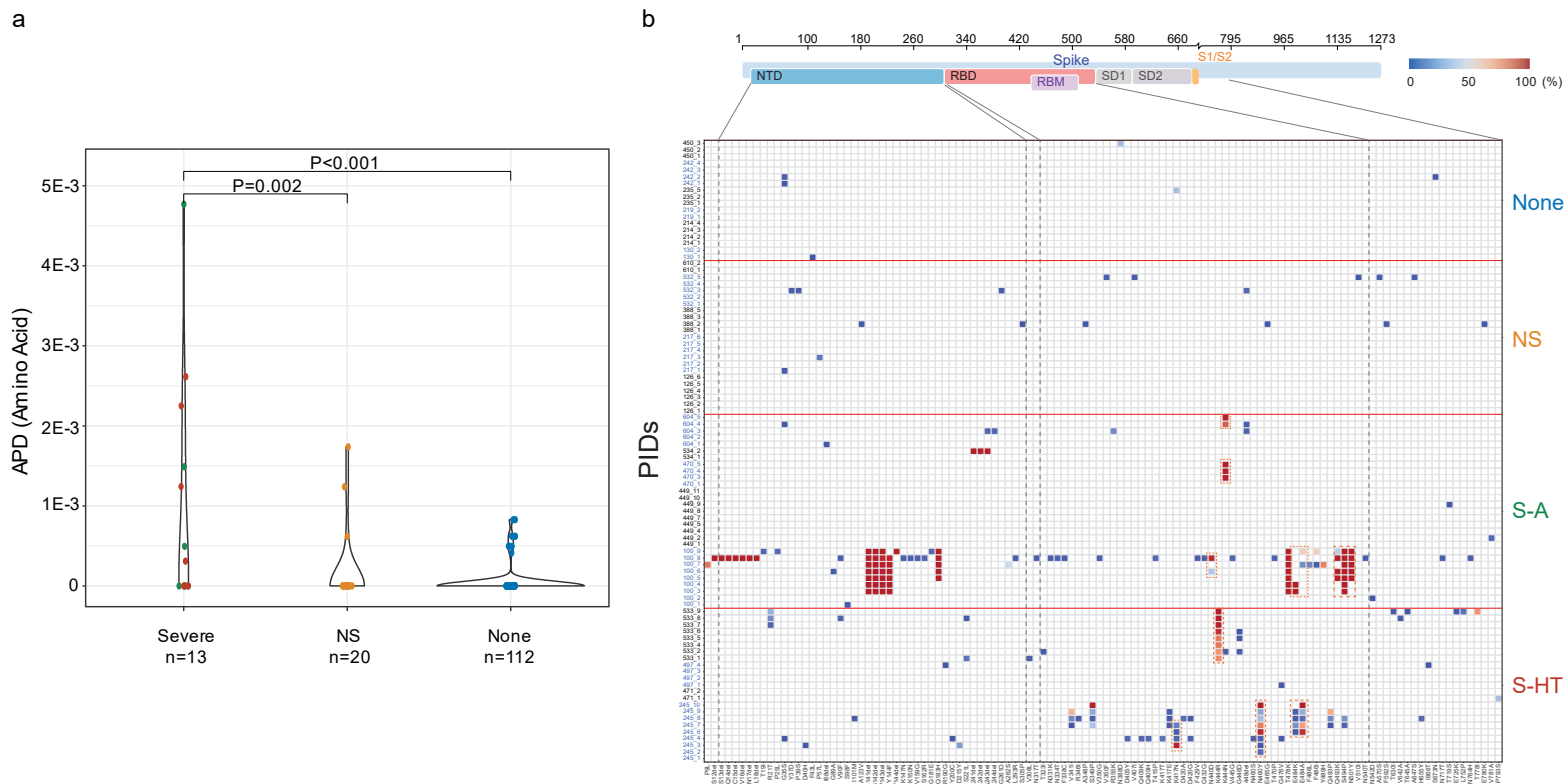

Supplementary Figure 2. SARS-CoV-2 mutations among different immunocompromised groups, supplementary to Fig. 2.

(a), SARS-CoV-2 intrahost mutations at the amino acid level among different immunocompromise groups. (b), Heat map showing distribution of Spike polymorphisms from participants receiving mAb treatment longitudinally. In the heatmap, y axis indicates participants' ID (PID) followed by sequential numbers of sample collection, while x axis shows amino acid positions in the Spike gene. Different domains of Spike are shown at the top. Colors indicate frequency of polymorphisms, with blue indicating the lowest value and red indicating the highest value in the scale. Participants in different study groups are separated by a red horizontal line. mAb resistance mutations are shown by red dotted box.



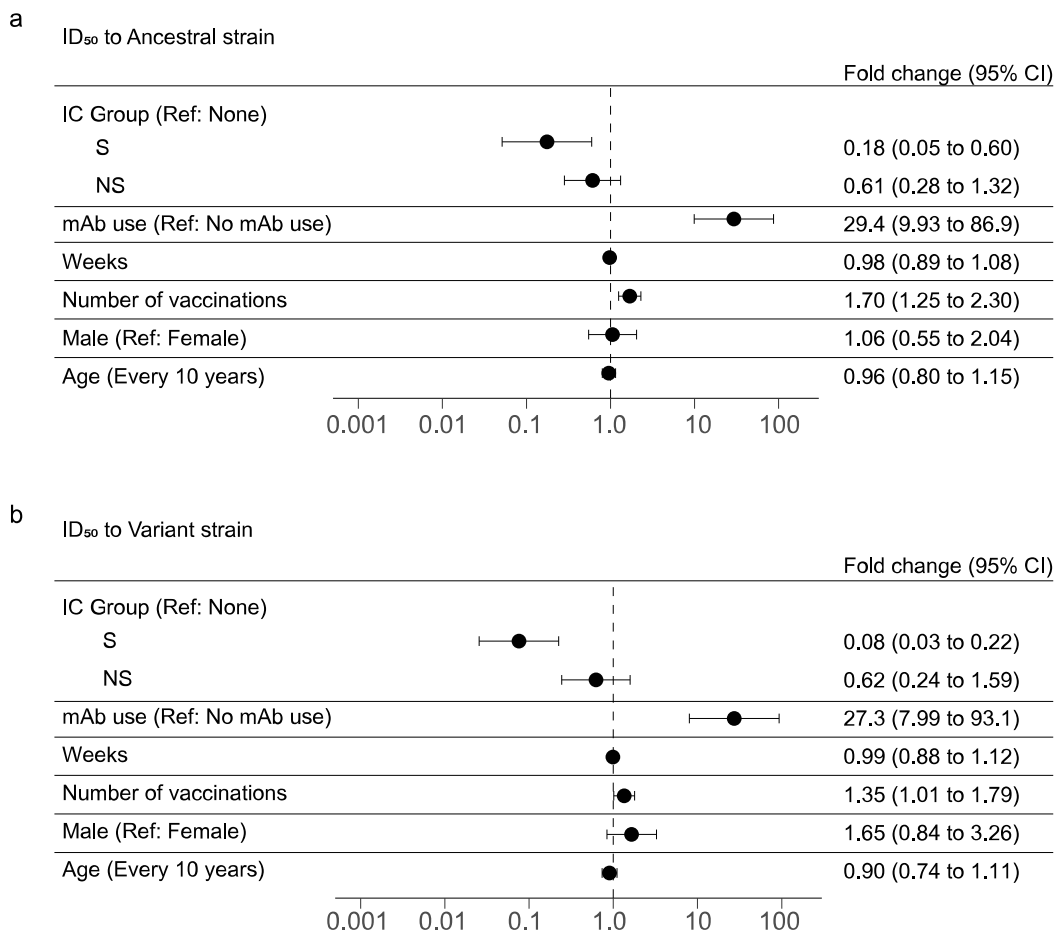

Supplementary Figure 3. Severe immunocompromise is associated with lower neutralizing antibody levels, supplemental to Fig. 3.

Generalized estimation equation to account for longitudinal repeated measurements was used to estimate the association between immunocompromise groups and neutralizing antibody levels against ancestral SARS-CoV-2 Spike protein (a) and variant-specific Spike protein (b). Monoclonal antibody (mAb) use, weeks since symptom onset or first positive PCR/antigen, numbers of vaccinations before enrollment, sex, and age were adjusted for in these models.

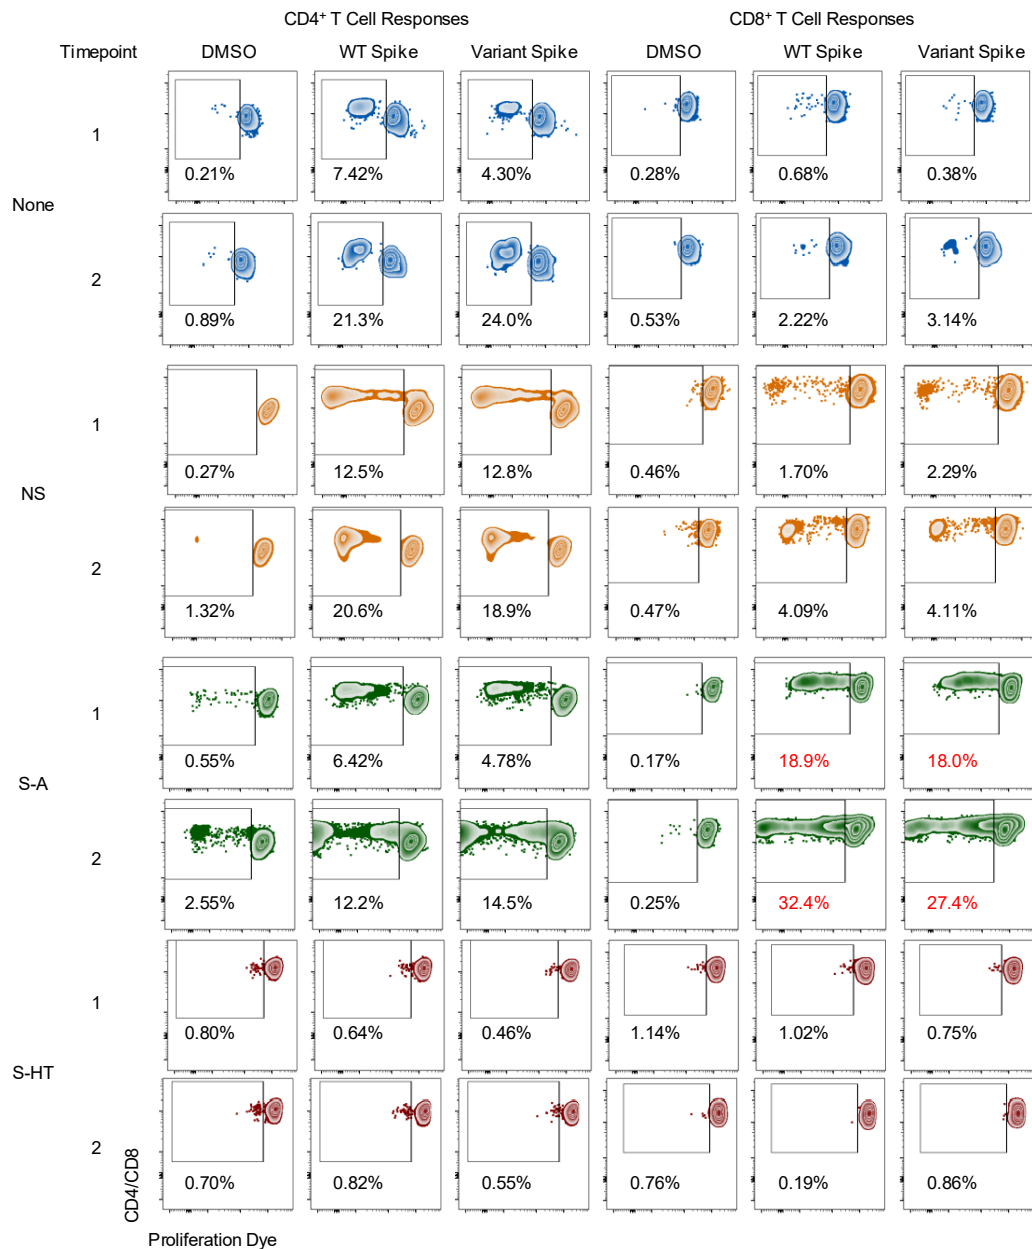

Supplementary Figure 4. Representative T cell proliferation assay gating scheme, supplementary to Fig. 4.

CD4<sup>+</sup> and CD8<sup>+</sup> T cell proliferation results from representative participants in each immunocompromise group are shown. Non-immunocompromised group, ID=261 (Omicron, BA.1); Non-severe group (NS), ID= 768 (Omicron, BF.5); Severe-autoimmune/B-cell deficient (S-A), ID=534 (Omicron, BA.2); Severe- hematological malignancy/transplant (S-HT), ID= 245 (Delta, B.1.617.2).

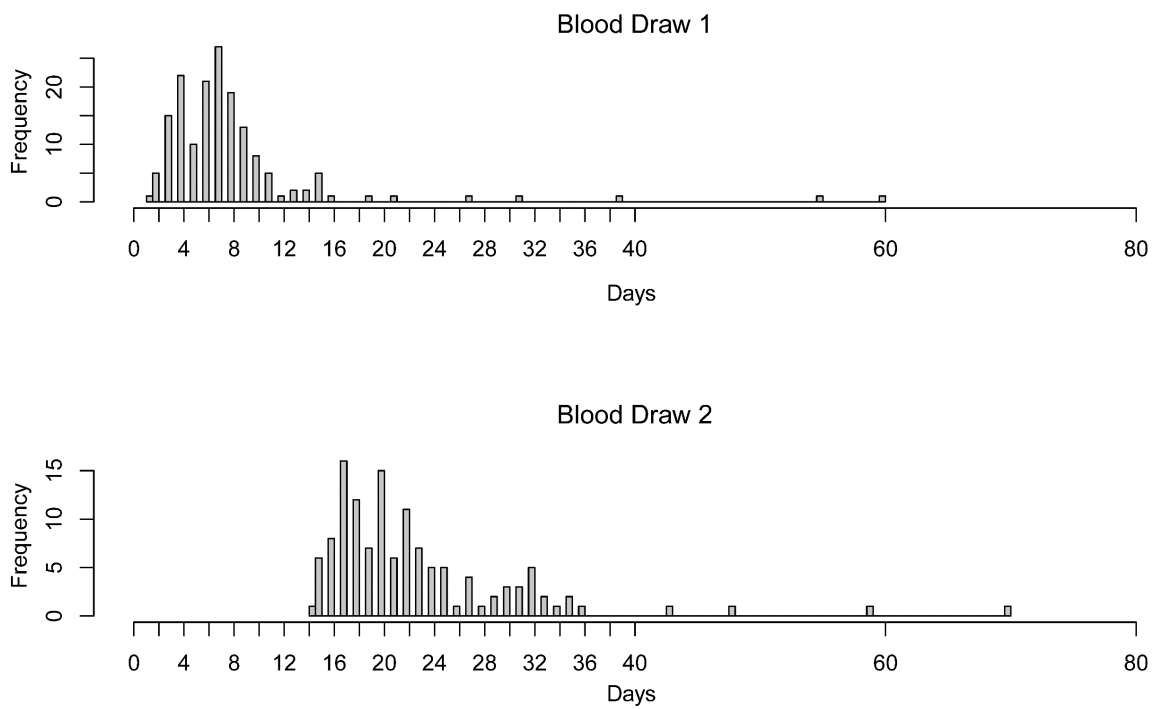

Supplementary Figure 5. Distribution of duration between symptom onset or first positive PCR and blood draws.

## References

1. Højsgaard, S., Halekoh, U. & Yan, J. The R Package geePack for Generalized Estimating Equations. *Journal of Statistical Software* **15**, 1 - 11 (2005).
